# Supplementary material
Source: PubMed Central journal article supplement (PMC7849018)
Supplement: AAC.02237-20-s0001.pdf [file AAC.02237-20-s0001.pdf]

# 1 **Supplementary Materials**

2

3 Title: Off-target In Vitro Profiling Demonstrates that Remdesivir Is a Highly Selective Antiviral

4 Agent

5 Authors: Yili Xu, Ona Barauskas\*, Cynthia Kim, Darius Babusis, Eisuke Murakami, Dmytro

6 Korniyev, Gary Lee, George Stepan, Michel Perron\*, Roy Bannister, Brian E. Schultz, Roman

7 Sakowicz, Danielle Porter, Tomas Cihlar, and Joy Y. Feng#

8

## 9 **Content**

10 Tables S1-S6

11 Figure legends S1-S4

12 Materials and Methods

13 Figures: S1-S4

14

15 **Table S1:** *In vitro* effects of RDV and GS-441524 on mtDNA levels after 10-day treatment in  
 16 HepG2 cells

| Study | Compound          | Concentration<br>( $\mu$ M) | Relative Amount of<br>mtDNA<br>(% Control) <sup>a</sup> | <i>p</i> -value Compared to<br>Control <sup>b</sup> |
|-------|-------------------|-----------------------------|---------------------------------------------------------|-----------------------------------------------------|
| 1     | DMSO<br>(control) | —                           | 100.0 $\pm$ 22.2                                        | —                                                   |
|       | RDV               | 0.04                        | 88.9 $\pm$ 30.4                                         | 0.215                                               |
|       |                   | 0.2                         | 98.1 $\pm$ 30.1                                         | 0.702                                               |
|       |                   | 1.0                         | 93.4 $\pm$ 27.1                                         | 0.436                                               |
|       | ddC               | 0.2                         | 76.9 $\pm$ 12.8                                         | 0.005                                               |
|       |                   | 2.0                         | 10.0 $\pm$ 3.8                                          | < 0.001                                             |
| 20.0  |                   | 0.7 $\pm$ 0.2               | < 0.001                                                 |                                                     |
| 2     | DMSO<br>(control) | —                           | 100.0 $\pm$ 20.3                                        | —                                                   |
|       | RDV               | 0.4                         | 122.8 $\pm$ 23.9                                        | 0.067                                               |
|       |                   | 2.0                         | 74.2 $\pm$ 11.7                                         | 0.008                                               |
|       |                   | 10.0                        | 148.0 $\pm$ 25.6                                        | 0.001                                               |
|       | ddC               | 0.2                         | 94.7 $\pm$ 3.4                                          | 0.005                                               |
|       |                   | 2.0                         | 56.5 $\pm$ 10.5                                         | < 0.001                                             |
| 20.0  |                   | 12.2 $\pm$ 2.8              | < 0.001                                                 |                                                     |
| 3     | DMSO<br>(control) | —                           | 100.0 $\pm$ 8.8                                         | —                                                   |
|       | GS-441524         | 1.0                         | 96.1 $\pm$ 31.5                                         | 0.70                                                |
|       |                   | 10.0                        | 90.3 $\pm$ 21.9                                         | 0.22                                                |
|       |                   | 100                         | 83.3 $\pm$ 11.7                                         | 0.003                                               |
|       | ddC               | 0.2                         | 57.0 $\pm$ 10.4                                         | < 0.001                                             |
|       |                   | 2.0                         | 25.1 $\pm$ 7.8                                          | < 0.001                                             |
| 20.0  |                   | 6.9 $\pm$ 2.9               | < 0.001                                                 |                                                     |

17 <sup>a</sup> Data represent average  $\pm$  SD of three independent experiments performed in triplicate.

18 <sup>b</sup> Paired, two-tailed Student's t-test.

19

20 **Table S2:** Formation of active metabolite GS-443902 in HEp-2, PC-3, and PHH cells after 24-hr  
21 treatment of RDV and GS-441524 at 1  $\mu$ M.

| Cells | Formation of 5'-triphosphate                                                    |                              |
|-------|---------------------------------------------------------------------------------|------------------------------|
|       | Concentration <sup>a</sup> (in pmole/million cells) and in $\mu$ M <sup>b</sup> |                              |
|       | RDV                                                                             | GS-441524                    |
| HEp-2 | 43 $\pm$ 6 (19 $\mu$ M <sup>b</sup> )                                           | 5.5 $\pm$ 1.1 (2.4 $\mu$ M)  |
| PC-3  | 153 $\pm$ 16 (81 $\mu$ M)                                                       | 6.6 $\pm$ 4.9 (3.5 $\mu$ M)  |
| PHH   | 45 $\pm$ 23 (13.6 $\mu$ M)                                                      | 1.9 $\pm$ 1.6 (0.56 $\mu$ M) |

22 <sup>a</sup> Represents average  $\pm$  STD of three independent experiments. Data for PHH was from three  
23 donors.

24 <sup>b</sup> The cellular concentration was converted to  $\mu$ M using the following cell volumes measured  
25 using confocal imaging: HEp-2 = 2.3  $\pm$  1.2 pL, PC-3 = 1.89  $\pm$  0.95 pL, and PHH = 3.4  $\pm$  0.2 pL  
26 based on measurements of > 50 cells. Data for PHH were measured using cells from three  
27 donors.

28

29

30 **Table S3:** Eighty-seven mammalian molecular targets tested against RDV-containing  
 31 diastereomeric mixture GS-466547 and the nucleoside analog GS-441524 at 10  $\mu$ M

| Category             | Family                     | Name                                                                                            | Species |
|----------------------|----------------------------|-------------------------------------------------------------------------------------------------|---------|
| GPCR                 | Acetylcholine              | M1, M2, M3, and M4                                                                              | human   |
|                      | Adenosine                  | A1, A2A                                                                                         | human   |
|                      | Adrenoceptor               | Alpha: 1A, 1B, 1D, 2A, 2B<br>Beta: 1 and 2                                                      | human   |
|                      | Angiotensin                | AT1                                                                                             | human   |
|                      | Bradykinin                 | B2                                                                                              | human   |
|                      | Cannabinoid                | CB1, CB2                                                                                        | human   |
|                      | Chemokine                  | CCR1, CXCR2 (IL-8RB)                                                                            | human   |
|                      | Cholecystekinin            | CCK1 (CCKA), CCK2 (CCKB)                                                                        | human   |
|                      | Dopamine                   | D1, D2S, D2L                                                                                    | human   |
|                      | Endothelin                 | ETA                                                                                             | human   |
|                      | GABAB                      | B1b/B2                                                                                          | human   |
|                      | Glutamate (metabotropic)   | mGlu5                                                                                           | human   |
|                      | Histamine                  | H1 and H2                                                                                       | human   |
|                      | Leukotriene                | CysLT1                                                                                          | human   |
|                      | Melanocortin               | MC1 and MC4                                                                                     | mouse   |
|                      | Neuropeptide Y             | Y1                                                                                              | human   |
|                      | Opioid                     | Delta (DOP), Kappa (KOP), Mu (MOP)                                                              | human   |
|                      | Platelet-activating factor | PAF                                                                                             | human   |
|                      | Serotonin                  | 5-HT1A, 5-HT2A, 5-HT2B, 5-HT2C                                                                  | human   |
|                      | Tachykinin                 | NK1                                                                                             | human   |
| Vasopressin/oxytocin | V1A                        | human                                                                                           |         |
| Nuclear receptor     | Androgen                   | AR                                                                                              | human   |
|                      | Estrogen                   | ERalpha                                                                                         | human   |
|                      | Glucocorticoid             | GR                                                                                              | human   |
|                      | Progesterone               | PR                                                                                              | human   |
|                      | Retinoic acid              | RARalpha (NR1B1)                                                                                | human   |
| Ion channel          | Acetylcholine              | nAChR (muscle-type)                                                                             | human   |
|                      | Calcium                    | Cav1.2, L-type: dihydropyridine site, diltiazem site, verapamil site; Cav2.2, N-type            | rat     |
|                      | GABAA                      | Non-selective: flunitrazepam-binding, TBOB-binding; Alpha1/beta2/gamma2 (human)                 | rat     |
|                      | Glutamate                  | Non-selective: TCP-binding, AMPA-binding, kainate-binding, NMDA-binding, strychnine-insensitive | rat     |

|                             |                                             |                                               |            |
|-----------------------------|---------------------------------------------|-----------------------------------------------|------------|
|                             | Glycine                                     | Strychnine-binding (non-selective)            | rat        |
|                             | Potassium                                   | KV (non-selective), hERG dofetilide-binding   | rat        |
|                             | Serotonin                                   | 5-HT1A, 5-HT1B, 5-HT2A, 5-HT2B, 5-HT2C, 5-HT3 | human      |
|                             | Sodium                                      | Batrachotoxinin binding (site 2)              | rat        |
| Transporter                 | Nucleoside                                  | Adenosine                                     | Guinea pig |
|                             | ATase                                       | Na <sup>+</sup> /K <sup>+</sup> , brain       | pig        |
|                             | Dopamine                                    | DAT                                           | human      |
|                             | GABA                                        | GABA (non-selective)                          | rat        |
|                             | Norepinephrine                              | NET                                           | human      |
|                             | Serotonin                                   | SET                                           | human      |
| Lipid metabolism            | Cyclooxygenase                              | COX1, COX2                                    | human      |
| Neurotransmitter metabolism | Monoamine oxidation                         | Monoamine oxidase MAO-A, MAO-B                | rat        |
|                             | Acetylcholine turnover                      | Acetylcholinesterase                          | human      |
|                             | Peroxisome proliferator-activated receptors | PPARgamma                                     | human      |
| Kinase                      | Insulin receptor kinase                     | IRK                                           | human      |
|                             | Tyrosine kinase                             | p56lck kinase (LCK)                           | human      |
|                             | PKC kinase                                  | PKCalpha                                      | human      |
| Phosphodiesterase           | Cyclic nucleotide signaling                 | PDE3A, PDE4D2                                 |            |
| Protease                    | Chymotrypsin serine peptidase               | Cathepsin G                                   | human      |
|                             | Zinc metalloprotease                        | Angiotensin converting enzyme (ACE)           | human      |

32

33

34

35

36

37 **Table S4:** Effect of compounds on mitochondrial respiration after 4-hour treatment in human  
 38 primary hepatocytes

| Compounds  | CC <sub>50</sub> (μM) <sup>a</sup> |           |       |
|------------|------------------------------------|-----------|-------|
|            | Spare Respiratory Capacity         | DNA Level | ATP   |
| RDV        | > 30                               | > 30      | > 30  |
| GS-704277  | > 100                              | > 100     | > 100 |
| GS-441524  | > 100                              | > 100     | > 100 |
| Phenformin | 15.0 ± 5.2                         | > 100     | > 100 |

39 <sup>a</sup> CC<sub>50</sub> values were reported as an average of three or more independent experiments

40

41 **Table S5:** Validation of the 2<sup>-ΔΔC<sub>T</sub></sup> Method for Cytochrome b and β-actin Target Genes

| Amount of Total Cellular DNA<br>(ng/reaction) | C <sub>T</sub> Value <sup>a</sup> |          |                       |
|-----------------------------------------------|-----------------------------------|----------|-----------------------|
|                                               | Cytochrome b                      | β-actine | ΔC <sub>T</sub> Value |
| 1.56                                          | 23.41                             | 32.74    | -9.33                 |
| 3.13                                          | 22.43                             | 31.82    | -9.39                 |
| 6.25                                          | 21.48                             | 30.8     | -9.32                 |
| 12.5                                          | 20.31                             | 29.9     | -9.59                 |
| 25                                            | 19.36                             | 29.14    | -9.78                 |
| 50                                            | 18.63                             | 28.5     | -9.87                 |

42 <sup>a</sup> The data represent the mean ± SD of three independent experiments performed in triplicate.

43

44

45 **Table S6:** DNA and RNA primers and templates used in single-nucleotide incorporation assays

| Oligonucleotides | Sequences <sup>a</sup>                                       |
|------------------|--------------------------------------------------------------|
| Primer (D19)     | 5'-GGTCCCTGTTCGGGCGCAC-3'                                    |
| Templates (D36)  | 3'-CGAAAGTCCAGGGACAAGCCC <b>G</b> CGTGT <b>T</b> GTATCTCT-5' |
|                  | 3'-CGAAAGTCCAGGGACAAGCCC <b>G</b> CGTGG <b>G</b> CTATCTCT-5' |
|                  | 3'-CGAAAGTCCAGGGACAAGCCC <b>G</b> CGTGA <b>A</b> CTATCTCT-5' |
|                  | 3'-CGAAAGTCCAGGGACAAGCCC <b>G</b> CGTG <b>C</b> GTATCTCT-5'  |
| Primer (R12)     | 5'-UUUUGCCGCGCC-3'                                           |
| Templates (D18)  | 3'-CGGCGCGGTACGTAAGGG-5'                                     |
|                  | 3'-CGGCGCGGGTACTAAGGG-5'                                     |
|                  | 3'-CGGCGCGG <b>A</b> CGTTAAGGG-5'                            |
|                  | 3'-CGGCGCGGCATGTAAGGG-5'                                     |

46  
 47 <sup>a</sup> The bold letter in the template sequences denotes the bases that pair with the incoming dNTP or  
 48 NTP.  
 49

50

51 **Figures legends**

52 Figure S1: Effect of GS-441524, parent nucleoside of RDV, on mitochondrial respiration (spare  
 53 respiratory capacity) (● blue, solid lines), ATP levels (■ red, dotted lines), and total DNA (◆  
 54 green, dashed lines) after a 3-day treatment in PC-3, HepG2, PHH, and RPTEC. The spare  
 55 respiratory capacity was normalized by cell numbers. GS-441524 showed minimal inhibition of  
 56 mitochondrial respiration, ATP levels, and total DNA in all cells tested.

57 Figure S2: Known mitochondrial toxin chloramphenicol showed a specific inhibition of  
 58 mitochondrial respiration (spare respiratory capacity) (● blue, solid lines), but no effect on ATP  
 59 levels (■ red, dotted lines) and total DNA (◆ green, dashed lines) after a 3-day treatment in PC-3.  
 60 The spare respiratory capacity was normalized by cell numbers.

61 Figure S3: Acute effect of RDV and its metabolites GS-704277 and GS-441524 on PHH after a  
 62 4-hour treatment. The effects on mitochondrial respiration (spare respiratory capacity) (● blue,  
 63 solid lines), ATP levels (■ red, dotted lines), and total DNA (◆ green, dashed lines) are shown as  
 64 % of DMSO-treated control. The spare respiratory capacity was normalized by cell numbers.  
 65 None of the compounds tested showed specific inhibition of mitochondrial respiration, ATP  
 66 levels, and total DNA, while the positive control phenformin, a known mitochondrial toxin,  
 67 showed specific inhibition of mitochondrial respiration.

68 Figure S4: Effect of GS-704277, a metabolite of RDV, on mitochondrial respiration (spare  
 69 respiratory capacity) (● blue, solid lines), ATP levels (■ red, dotted lines), and total DNA (◆  
 70 green, dashed lines) after a 3-day treatment in PHH. The spare respiratory capacity was  
 71 normalized by cell numbers. GS-704277 showed no inhibition of the mitochondrial respiration,  
 72 ATP levels, and total DNA at the highest concentration tested (100 μM). Phenformin, a known  
 73 mitochondria toxin, specifically inhibited mitochondrial respiration.

74

## 75 **Materials and Methods**

### 76 **HPLC-MS/MS method**

77 HPLC parameters

78 Column: Phenomenex Luna C18 HST 2.5 μm 2.0 x 50 mm column (part No. 00B-4446-B0)

79 Mobile phases: Mobile phase A containing 3 mM ammonium formate (pH 5) with 10 mM  
 80 dimethylhexylamine (DMHA) in water; Mobile phase B containing 3 mM ammonium formate  
 81 (pH 5) with 10 mM DMHA in 50% acetonitrile.

82 HPLC pump and Autosampler: Shimadzu LC-30AD binary pump system was used for elution  
 83 and separation, with an HTC PAL autosampler from LEAP Technologies.

84 Flow rate: 0.35 mL/min

85 HPLC elution program:

| Time (min) | Mobile Phase B (%) |
|------------|--------------------|
| 0          | 18                 |
| 0.5        | 18                 |
| 4.2        | 50                 |
| 5.2        | 70                 |
| 6.0        | 100                |
| 6.2        | 18                 |

86 Sciex QTrap 6500+ mass spectrometer was used for metabolite analysis in multiple reaction  
 87 monitoring (MRM) mode.

88 *Mass spectrometry parameters*

| Ion source | Probe height (mm) | Spray voltage (V) | Temperature (°C) | Entrance Potential (V) | Curtain gas (psi) | GS1 (psi) | GS2 (psi) | Collision gas (psi) |
|------------|-------------------|-------------------|------------------|------------------------|-------------------|-----------|-----------|---------------------|
| ESI +      | 4                 | 5500              | 550              | 10                     | 30                | 30        | 30        | 9                   |

89 *MRM Channels*



| Analyte      | Description          | Parent Mass (m/z) | Product Mass (m/z) | Declustering Potential (V) | Collision Energy (volts) | CXP (volts) |
|--------------|----------------------|-------------------|--------------------|----------------------------|--------------------------|-------------|
| GS-441524    | Parent               | 292.0             | 202.1              | 120                        | 17                       | 14          |
| GS-441524-MP | Parent-monophosphate | 372.0             | 202.1              | 120                        | 22                       | 20          |
| GS-441524-DP | Parent-diphosphate   | 452.0             | 202.1              | 120                        | 23                       | 20          |
| GS-443902    | Parent-triphosphate  | 532.0             | 202.1              | 120                        | 29                       | 13          |
| Chloro-ATP   | Internal standard    | 541.9             | 169.9              | 120                        | 39                       | 36          |

90

91 *Calibration Standard Curve*

| <i>Standard</i> | <i>Concentration (fmol/sample)</i> |
|-----------------|------------------------------------|
| 1               | 40,000                             |
| 2               | 10,000                             |
| 3               | 2,500                              |
| 4               | 625                                |
| 5               | 156                                |
| 6               | 39.1                               |

92

93 *Retention Times*

| <i>Analyte</i> | <i>Retention Time (min)</i> |
|----------------|-----------------------------|
| Chloro-ATP     | 4.8                         |
| GS-443902      | 4.7                         |
| GS-441524-DP   | 4.1                         |
| GS-441524-MP   | 3.1                         |
| GS-441524      | 1.5                         |

94

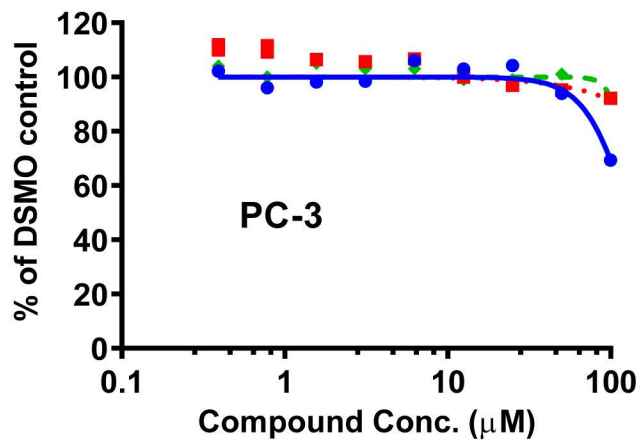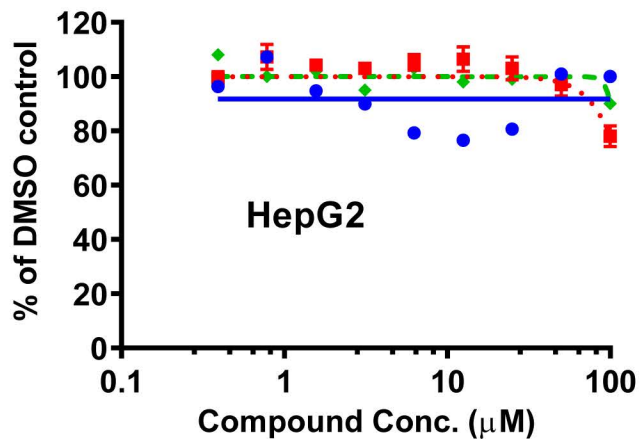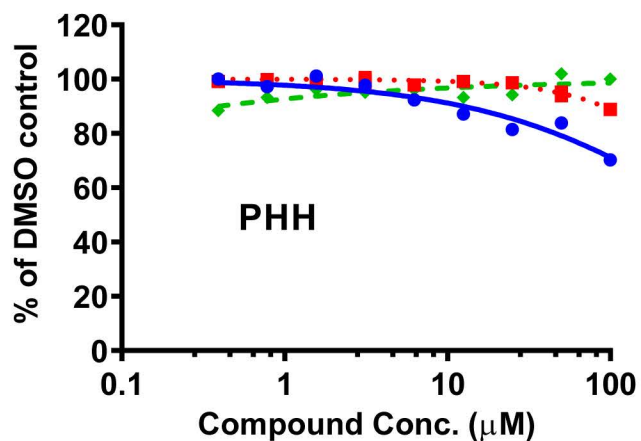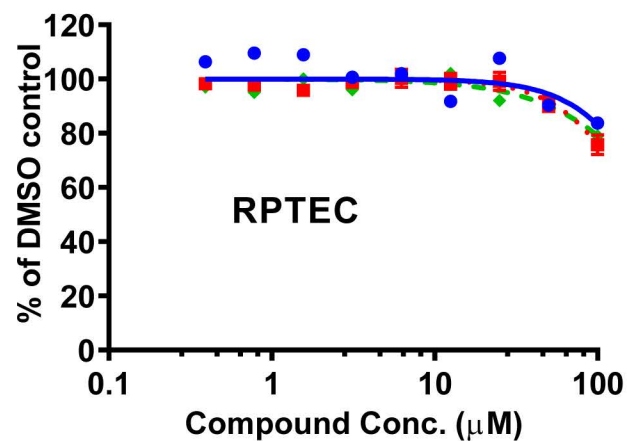

**Figure S1.** Effect of GS-441524, the parent nucleoside of RDV, on mitochondrial respiration (spare respiratory capacity) (● blue, solid lines), ATP level (■ red, dotted lines), and total DNA (◆ green, dashed lines) after 3-day treatment in PC-3, HepG2, PHH, and RPTEC. The spare respiratory capacity was normalized by cell numbers. GS-441524 showed minimal inhibition of mitochondrial respiration, ATP level, and total DNA in all cells tested.

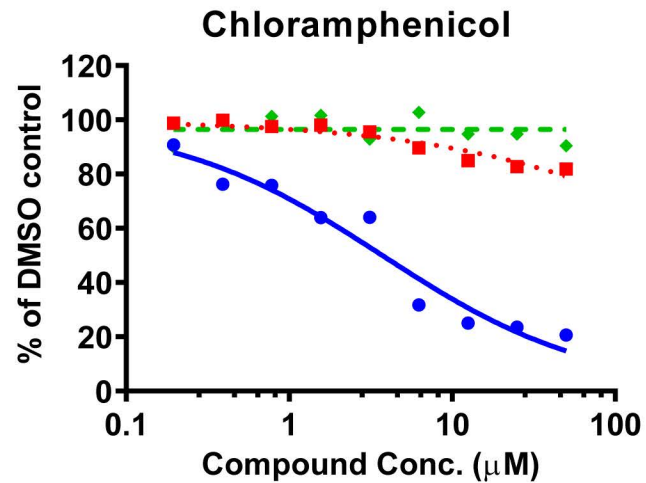

**Figure S2.** The known mitochondrial toxin chloramphenicol showed specific inhibition of mitochondrial respiration (spare respiratory capacity) (● blue, solid lines), but no effect on ATP level (■ red, dotted lines) and total DNA (◆ green, dashed lines) after 3-day treatment in PC-3. The spare respiratory capacity was normalized by cell numbers.

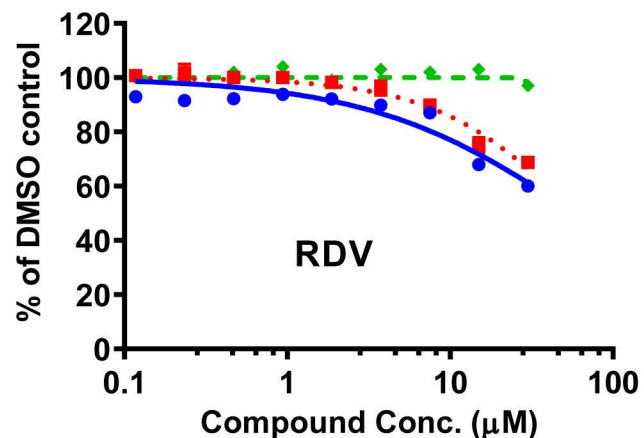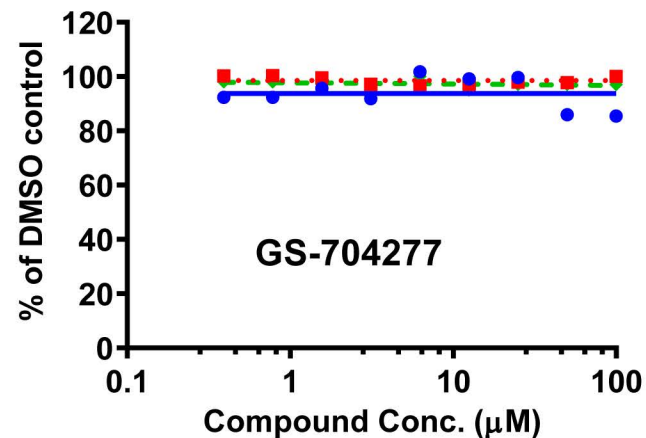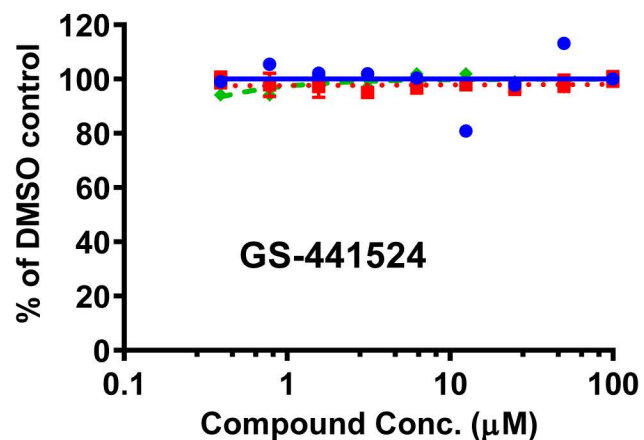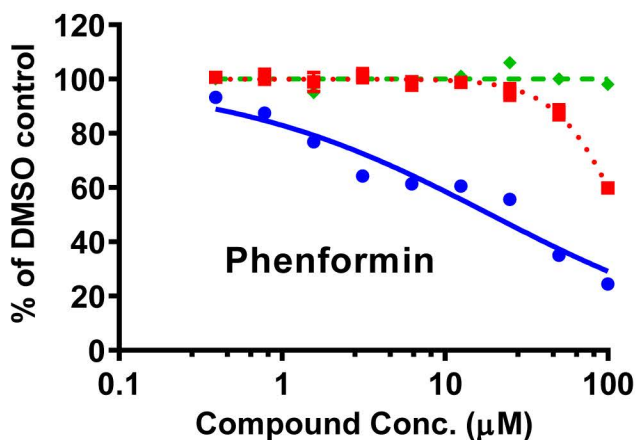

**Figure S3.** Acute effect of RDV and its metabolites GS-704277 and GS-441524 on PHH post 4-hr treatment. The effects on mitochondrial respiration (spare respiratory capacity) (● blue, solid lines), ATP level (■ red, dotted lines), and total DNA (◆ green, dashed lines) are shown as % of DMSO-treated control. The spare respiratory capacity was normalized by cell numbers. None of the compounds tested showed specific inhibition of the mitochondrial respiration, ATP level, or total DNA, while the positive control phenformin, a known mitochondrial toxin, showed specific inhibition of mitochondrial respiration.

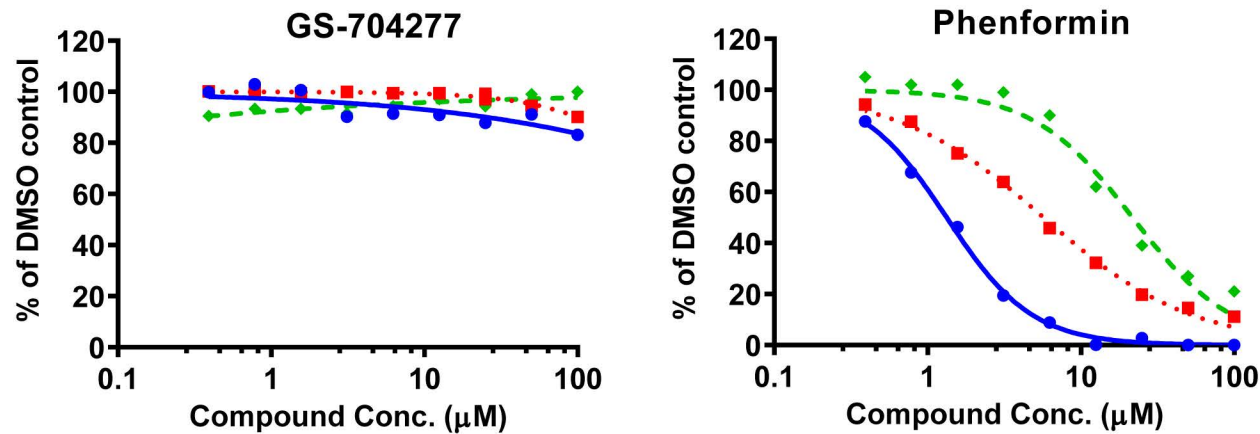

**Figure S4.** Effect of GS-704277, a metabolite of RDV, on mitochondrial respiration (spare respiratory capacity) (● blue, solid lines), ATP level (■ red, dotted lines), and total DNA (◆ green, dashed lines) after 3-day treatment in PHH. The spare respiratory capacity was normalized by cell numbers. GS-704277 showed no inhibition of the mitochondrial respiration, ATP level, and total DNA at the highest concentration tested (100 µM). Phenformin, a known mitochondria toxin, specifically inhibited mitochondrial respiration.
